# Supplementary material for: CCR5 is a suppressor for cortical plasticity and hippocampal learning and memory
Source: eLife. 2016 Dec 20;5:e20985. doi: 10.7554/eLife.20985 (PMC5213777; doi:10.7554/eLife.20985)
Supplement: Figure 1—source data 1. — DOI: http://dx.doi.org/10.7554/eLife.20985.003 [file elife-20985-fig1-data1.xlsx]

## Sheet: Mouse MGI
Strain name	Full name	MGI accession #
Adcyap1	Adenylate cyclase activating polypeptide 1	MGI:105094
Adipoq	Adiponectin, C1Q and collagen domain containing	MGI:106675
Adipor2	Adiponectin receptor 2	MGI:93830
Agtr1a	Angiotensin II receptor, type 1a	MGI:87964
Akt1	Thymoma viral proto-oncogene 1	MGI:87986
Akt2	Thymoma viral proto-oncogene 2	MGI:104874
Aldh5a1	Aldhehyde dehydrogenase family 5, subfamily A1	MGI:2441982
Apob	Apolipoprotein B	MGI:88052
APPSw	Transgene insertion 40, Bruce Lamb	MGI:3510594
ATF3_677	Activating transcription factor 3	MGI:109384
Atp7a	ATPase, Cu++ transporting, alpha polypeptide	MGI:99400
Bace1	Beta-site APP cleaving enzyme 1	MGI:1346542
Bax	BCL2-associated X protein	MGI:99702
Bche	Butyrylcholinesterase	MGI: 894278
Bdnf	Brain derived neurotrophic factor	MGI:88145
Car4	carbonic anhydrase 4	MGI:1096574
Car14	Carbonic anhydrase 14	MGI:1344341
Casp2	Caspase 2	MGI:97295
Casp6	Caspase 6	MGI:1312921
Casp7	Caspase 7	MGI:109383
Cav1	Caveolin 1, caveolae protein	MGI:102709
Ccl3	Chemokine (C-C motif) ligand 3	MGI:98260
Ccl5	Chemokine (C-C motif) ligand 5	MGI:98262
Ccr5	Chemokine (C-C motif) receptor 5	MGI:107182
Ccr7	Chemokine (C-C motif) receptor 7	MGI:103011
Ccrn4l	CCR4 carbon catabolite repression 4-like (S. cerevisiae)	MGI:109382
Cd1d1.Cd1d2	CD1d1 antigen	MGI:107674/107675
Cd19	CD19 antigen	MGI:88319
Cd22	CD22 antigen	MGI:88322
Cd33	CD33 antigen	MGI:99440
Cd40lg	CD40 ligand	MGI:88337
Cd80	CD80 antigen	MGI:101775
Cd86	Cd86 antigen	MGI:101773
Cd247	Cd247 antigen	MGI:88334
Cebpa	CCAAT/enhancer binding protein (C/EBP), alpha	MGI:99480
Chrna7	Cholinergic receptor, nicotinic, alpha polypeptide 7	MGI:99779
Cntnap2	contactin associated protein-like 2	MGI:1914047
Crkl	V-crk sarcoma virus CT10 oncogene homolog (avian)-like	MGI:104686
Csf2rb	Colony stimulating factor 2 receptor, beta, low-affinity (granulocyte-macrophage)	MGI:1339759
Csnk1d	Casein kinase 1, delta	MGI:1355272
Csnk1e	Casein kinase 1, epsilon	MGI:1351660
Cx3cr1	Chemokine (C-X3-C) receptor 1	MGI:1333815
Cxcr3	Chemokine (C-X-C motif) receptor 3	MGI:1277207
Cxcr5	Chemochine (C-X-C motif) receptor 5	MGI:103567
Cxcr6	Chemokine (C-X-C motif) receptor 6	MGI:1934582
Dag1	Dystroglycan 1	MGI:101864
Ddit3	DNA-damage inducible transcript 3	MGI:109247
Drd4	Dopamine receptor 4	MGI:94926
Dvl1	Dishevelled, dsh homolog 1 (Drosophila)	MGI:94941
Eif2ak4	Eukaryotic translation initiation factor 2 alpha kinase 4	MGI:1353427
Eraf	Erythroid associated factor	MGI:2158492
Erap1	Endoplasmic reticulum aminopeptidase 1	MGI:193340
Fcgr3	Fc receptor, IgG, low affinity III	MGI:95500
Fcgrt	Fc receptor, IgG, alpha chain transporter	MGI:103017
Fxn	Frataxin	MGI:1096879
Grem1	Gremlin 1	MGI:1344337
Grin3b	Glutamate receptor, ionotropic, NMDA3B	MGI:2150393
Gusb	Glucuronidase, beta	MGI:95872
Gzmb	Granzyme B	MGI:109267
Hcn4	Hyperpolarization-activated, cyclic nucleotide-gated K+ 4	MGI:1298209
hGFAP.tTA x VIPP	Vesicle-inducing protein in plastids	*
hGFAP.tTA x tetO.SNARE	Soluble N-ethylmaleimide-sensitive factor attachment protein receptor	**
Hif1a	Hypoxia inducible factor 1, alpha subunit	MGI:106918
Hr	Hairless	MGI:96223
H-ras	Harvey rat sarcoma virus oncogene	MGI:96224
Hsp27	Heat Shock Protein 27	MGI:96240
Icos	Inducible T-cell co-stimulator	MGI:1858745
Id3	Inhibitor of DNA binding 3	MGI:96398
Il1r1	Interleukin 1 receptor, type I	MGI:96545
Il1rn	Interleukin 1 receptor antagonist	MGI:96547
Il2	Interleukin 2	MGI:96548
Il2ra	Interleukin 2 receptor, alpha chain	MGI:96549
Il4	Interleukin 4	MGI:96556
Il12a	Interleukin 12a	MGI:96539
Il12rb2	Interleukin 12 receptor, beta 2	MGI:1270861
Ing1	Inhibitor of growth family, member 1	MGI:1349481
Irf1	Interferon regulatory factor 1	MGI:96590
Itgae	Integrin alpha E, epithelial-associated	MGI:1298377
Itgal	Integrin alpha L	MGI:96606
Itgb3	Integrin beta 3	MGI:96612
Jag1	Jagged 1	MGI:1095416
Jag2	Jagged 2	MGI:1098270
Kcnn2	Potassium intermediate/small conductance calcium-activated channel, subfamily N, member 2	MGI:2153182
Lmna	Lamin A	MGI:96794
Lpl	Lipoprotein lipase	MGI:96820
Lta	Lymphotoxin A	MGI:104797
Lyve1	Lymphatic vessel endothelial hyaluronan receptor 1	MGI:2136348
Map2k3	Mitogen-activated protein kinase kinase 3	MGI:1346868
Matk	Megakaryocyte-associated tyrosine kinase	MGI:99259
Mecp2	Methyl CpG binding protein 2	MGI:99918
Mgl1	Macrophage galactose N-acetyl-galactosamine specific lectin 1	MGI:96975
Mlxipl	MLX interacting protein-like	MGI:1927999
Mmp7	Matrix metallopeptidase 7	MGI:103189
Mmp12	Matrix metallopeptidase 12	MGI:97005
MPO	Myeloperoxidase	MGI:97137
Msr1	Macrophage scavenger receptor 1	MGI:98257
Myd88	myeloid differentiation primary response gene 88	MGI:108005
Nod2	Nucleotide-binding oligomerization domain containing 2	MGI:2429397
Nos1	Nitric oxide synthase 1, neuronal	MGI:97360
Nr1h4	Nuclear receptor subfamily 1, group H, member 4	MGI:1352464
Nr2e3rd7	Retinal degeneration 7	MGI:1859180
Oprd1	Opioid receptor, delta 1	MGI:97438
Oprm1	Opioid receptor, mu 1	MGI:97441
Osr1	Odd-skipped related 1 (Drosophila)	MGI:1344424
P2rx7	Purinergic receptor P2X, ligand-gated ion channel, 7	MGI:1339957
Park2	Parkinson disease (autosomal recessive, juvenile) 2, parkin	MGI:1355296
Pcsk1	Proprotein convertase subtilisin/kexin type 1	MGI:97511
Pctp	Phosphatidylcholine transfer protein	MGI:107375
Per1	Period homolog 1	MGI:1098283
Per3	Period homolog 3	MGI:1277134
Plac8	Placenta-specific 8	MGI:2445289
Pnlip	Pancreatic lipase	MGI:97722
Pparg	Peroxisome proliferator activated receptor gamma	MGI:97747
Prf1	Perforin 1 (pore forming protein)	MGI:97551
Ptgs2	Prostaglandin-endoperoxide synthase 2	MGI:97798
Pvrl1	Poliovirus receptor-related 1	MGI:1926483
Rorc	RAR-related orphan receptor gamma	MGI:104856
Rpsa	Ribosomal protein SA	MGI:105381
Scd1	Stearoyl-Coenzyme A desaturase 1	MGI:98239
Scd1	Stearoyl-Coenzyme A desaturase 1	MGI:98239
Scp2	Sterol carrier protein 2, liver	MGI:98254
Sele	Selectin, endothelial cell	MGI:98278
Selp	Selectin, platelet	MGI:98280
Sepp1	Selenoprotein P, plasma, 1	MGI:894288
Serpinb9	Serine (or cysteine) peptidase inhibitor, clade B, member 9	MGI:106603
Skil	SKI-like	MGI:106203
Snai1	Snail homolog 1	MGI:98330
Snai2	Snail homolog 2	MGI:1096393
Sncg	Synuclein, gamma	MGI:1298397
Sod2	superoxide dismutase 2, mitochondrial	MGI:98352
Sod3	Superoxide dismutase 3,extracellular	MGI:103181
Sorl1	Sortilin-related receptor, LDLR class A repeats-containing	MGI:1202296
Spp1	Secreted phosphoprotein 1	MGI:98389
Syt7	Synaptotagmin VII	MGI:1859545
Tagln	Transgelin	MGI:106012
Tcra	T-cell receptor alpha chain	MGI:98553
Tcrd	T cell receptor delta chain	MGI:98611
Tep1	telomerase associated protein 1	MGI:109573
Tep1/Vparp	Telomerase associated protein 1/Vault poly(ADP-ribose) polymerase Double KO	MGI:109573/3046826
Thbs1	Thrombospondin 1	MGI:98737
Timp1	Inhibitor of metalloproteinase 1	MGI:98752
TNF	tumor necrosis factor	MGI:104798
Tnfrsf11b	Tumor necrosis factor receptor superfamily, member 11b	MGI:109587
Tnks2	Tankyrase, TRF1-interacting ankyrin-related ADP-ribose polymerase 2	MGI:1921743
Trp63	Transformation related protein 63	MGI:1330810
Trpv3	Transient receptor potential cation channel, subfamily V, member 3	MGI:2181407
Ugt1	UDP glucuronosyltransferase 1 complex	MGI:3785283
Vip	Vasoactive intestinal polypeptide	MGI:98933
